# Supplementary material
Source: HighWire-hosted journal article supplement (https://erj.ersjournals.com/content/54/3/1901394)
Supplement: inline-supplementary-material-1 [file inline-supplementary-material-1.pdf]

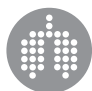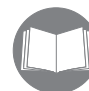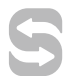

SHAREABLE PDF

# Global tuberculosis prevention: should we start from the beginning?

Giovanni Sotgiu <sup>1</sup>, Delia Goletti <sup>2</sup> and Alberto Matteelli <sup>3</sup>

**Affiliations:** <sup>1</sup>Clinical Epidemiology and Medical Statistics Unit, Dept of Medical, Surgical and Experimental Sciences, University of Sassari, Sassari, Italy. <sup>2</sup>Translational Research Unit, National Institute for Infectious Diseases, Rome, Italy. <sup>3</sup>Institute of Infectious and Tropical Diseases, WHO Collaborating Centre for TB/HIV co-infection and TB elimination, University of Brescia, Brescia, Italy.

**Correspondence:** Giovanni Sotgiu, Clinical Epidemiology and Medical Statistics Unit, Dept of Medical, Surgical and Experimental Sciences, University of Sassari, Via Padre Manzella, 4, Sassari – 07100, Italy. E-mail: gsotgiu@uniss.it

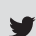

@ERSpublications

**TB prevention should be based on a global and local comprehensive assessment of LTBI burden**  
<http://bit.ly/2YfKM0T>

**Cite this article as:** Sotgiu G, Goletti D, Matteelli A. Global tuberculosis prevention: should we start from the beginning?. *Eur Respir J* 2019; 54: 1901394 [https://doi.org/10.1183/13993003.01394-2019].

This single-page version can be shared freely online.

Tuberculosis (TB), which is estimated to be the deadliest infectious disease worldwide with ~1.6 million deaths yearly [1], is a clinical issue due to the “ancient” diagnostics and drugs currently available. If compared with the management of other highly prevalent infectious diseases, such as HIV/AIDS and hepatitis C virus infection, it is clear that the clinical approach for TB disease requires innovation, being still based on means with limited efficacy (e.g. treatment of multidrug-resistant TB; MDR-TB), and characterised by the denominator “long duration”: conventional bacteriological diagnosis, therapy for the drug-susceptible disease (i.e. 6 months) and MDR-TB (i.e. >20 months) [2–7].
